# Supplementary material
Source: publisher figshare collection journal article supplement (https://acs.figshare.com/ndownloader/files/3993958)
Supplement: Supplementary file 1 [file 3993958]

## Supporting Information

### Combinatorial high-throughput screening for highly active Pd-Ir-Ce based ternary catalysts in electrochemical oxygen reduction reaction

*Sung Hyeon Park,<sup>a</sup> Chang Hyuck Choi,<sup>a</sup> Jae Kang Koh,<sup>b</sup> Chanhoo Pak,<sup>c</sup> Seon-ah Jin,<sup>c</sup>  
and Seong Ihl Woo<sup>a,b,\*</sup>*

<sup>a</sup>Department of Chemical and Biomolecular Engineering, Korea Advanced Institute of Science and Technology, Daejeon 305-701, Republic of Korea.

<sup>b</sup>Graduate School of EEWS (WCU), Korea Advanced Institute of Science and Technology, Daejeon 305-701, Republic of Korea.

<sup>c</sup>Samsung Advanced Institute of Technology, Nongseo-dong, Giheung-gu, Yongin-si, Gyeonggi-do, Republic of Korea.

\*Corresponding author: [siwoo@kaist.ac.kr](mailto:siwoo@kaist.ac.kr)

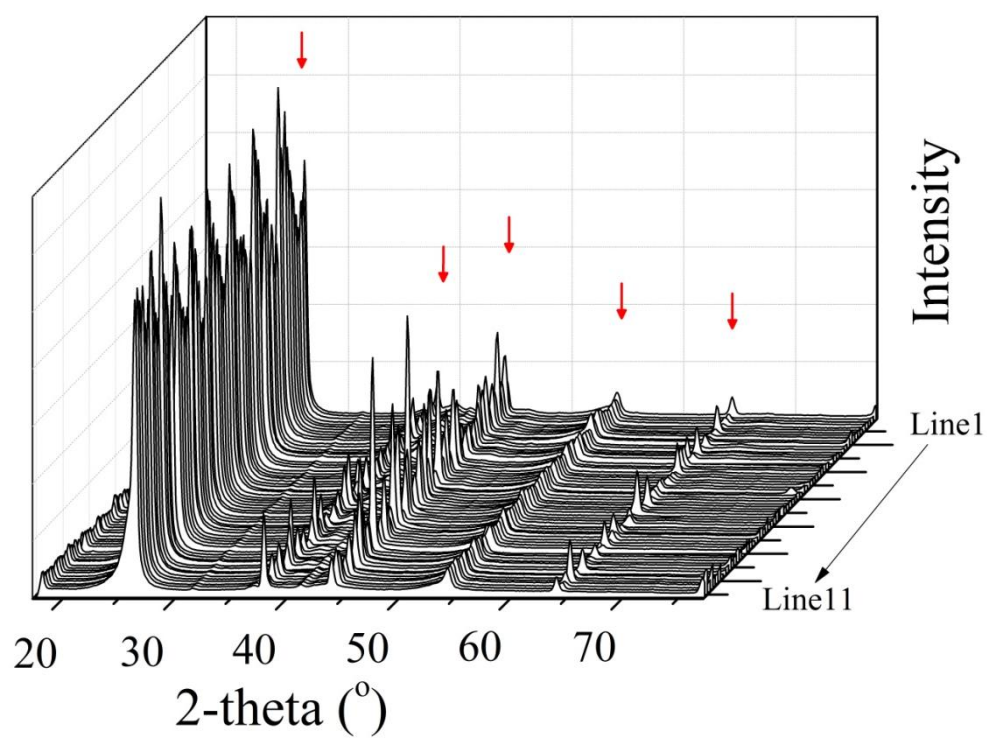

**Figure S1.** XRD patterns of all the catalyst spots for Pd-Ir-Ce combinatorial array between the ranges of 17.7 to 77.7°. The red arrows indicate the XRD patterns of the carbon paper (support). The lines 1 through 11 are as described in Figure 1a.

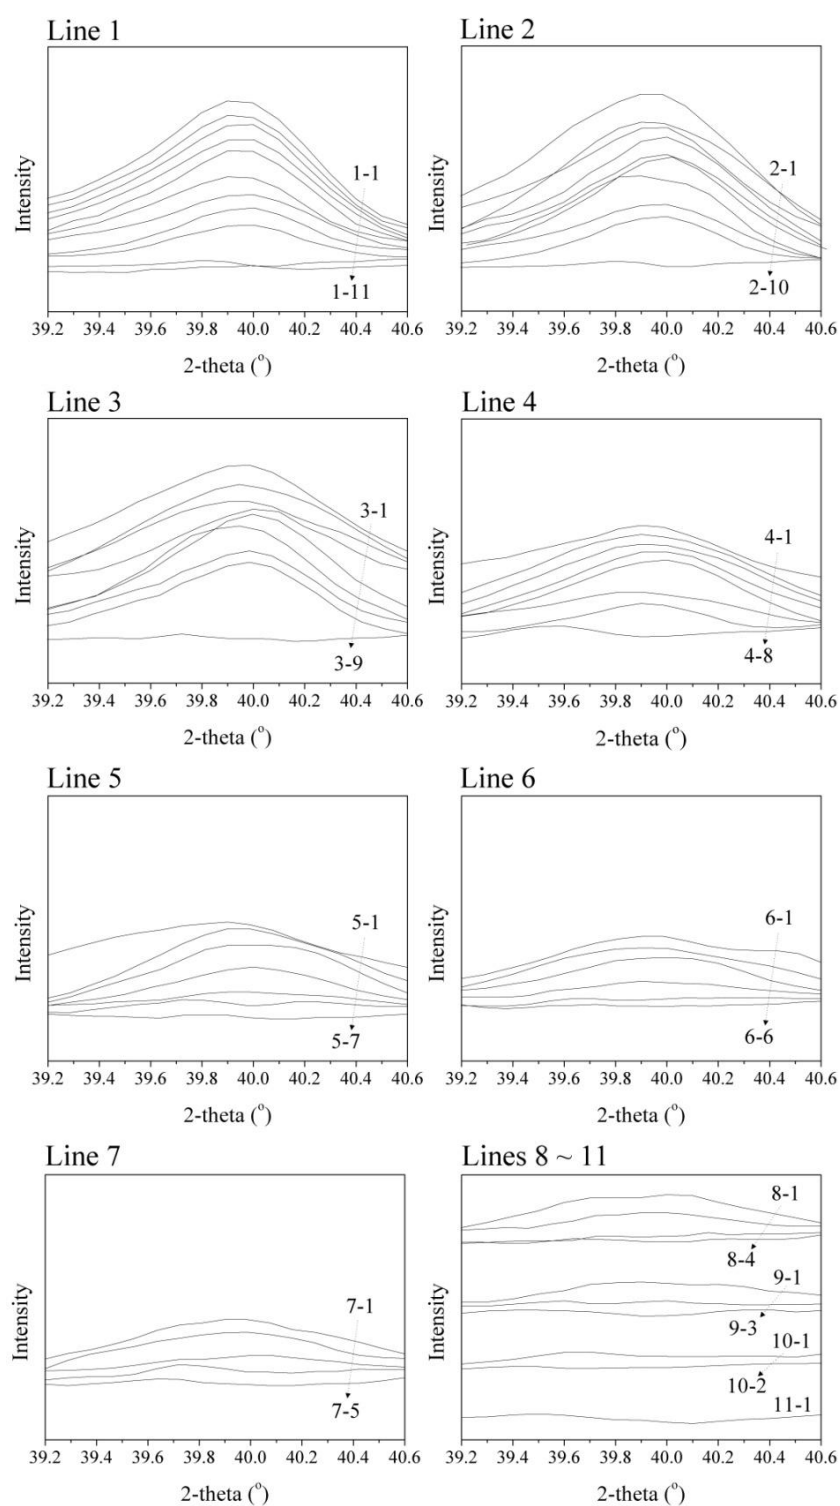

**Figure S2.** XRD patterns all the catalyst spots for Pd-Ir-Ce combinatorial array, arranged for every line for each coordinate.
